# Supplementary material for: Differences in Diet Quality between School Lunch Participants and Nonparticipants in the United States by Income and Race
Source: PubMed Central journal article supplement (PMC7765856; doi:10.3390/nu12123891), 2020-12-19
Supplement: nutrients-12-03891-s001.pdf [file nutrients-12-03891-s001.pdf]

**Table 1.** Differences between NSLP participants and nonparticipants in mean HEI-2010 scores for lunch intakes, by household income (including 95% CIs).

|                                                                                              | Lower-Income Students          |                              |                                                     | Higher-Income Students         |                              |                                                     |
|----------------------------------------------------------------------------------------------|--------------------------------|------------------------------|-----------------------------------------------------|--------------------------------|------------------------------|-----------------------------------------------------|
|                                                                                              | NSLP Participants<br>(n = 757) | Nonparticipants<br>(n = 210) | Difference<br>(NSLP Participants – Nonparticipants) | NSLP Participants<br>(n = 475) | Nonparticipants<br>(n = 614) | Difference<br>(NSLP Participants – Nonparticipants) |
| Adequacy components: Higher scores reflect higher concentrations in students' lunch intakes  |                                |                              |                                                     |                                |                              |                                                     |
| Total fruit                                                                                  | 100.0<br>(100.0, 100.0)        | 82.6<br>(54.8, 100.0)        | 17.4                                                | 98.5<br>(88.5, 100.0)          | 99.6<br>(93.8, 100.0)        | -1.1                                                |
| Whole fruit                                                                                  | 100.0<br>(100.0, 100.0)        | 98.4<br>(78.1, 100.0)        | 1.6                                                 | 100.0<br>(100.0, 100.0)        | 100.0<br>(100.0, 100.0)      | 0.0                                                 |
| Total vegetables                                                                             | 55.1<br>(47.7, 62.2)           | 33.5<br>(21.7, 47.3)         | 21.6*                                               | 48.9<br>(40.6, 57.2)           | 35.8<br>(30.6, 40.9)         | 13.1*                                               |
| Greens and beans                                                                             | 35.3<br>(18.1, 51.1)           | 26.9<br>(11.5, 42.9)         | 8.5                                                 | 12.1<br>(4.0, 23.6)            | 26.5<br>(10.0, 42.5)         | -14.4                                               |
| Whole grains                                                                                 | 100.0<br>(100.0, 100.0)        | 61.6<br>(39.3, 89.2)         | 38.4*                                               | 100.0<br>(100.0, 100.0)        | 61.0<br>(49.6, 72.5)         | 39.0*                                               |
| Dairy                                                                                        | 100.0<br>(100.0, 100.0)        | 69.5<br>(54.6, 86.8)         | 30.5*                                               | 100.0<br>(100.0, 100.0)        | 64.5<br>(56.4, 72.8)         | 35.5*                                               |
| Total protein foods                                                                          | 99.0<br>(88.5, 100.0)          | 99.5<br>(91.9, 100.0)        | -0.5                                                | 98.1<br>(90.7, 100.0)          | 99.9<br>(99.9, 100.0)        | -1.9                                                |
| Seafood and plant proteins                                                                   | 39.6<br>(23.7, 56.8)           | 94.9<br>(40.2, 100.0)        | -55.3*                                              | 77.4<br>(55.8, 98.5)           | 86.7<br>(65.6, 100.0)        | -9.3                                                |
| Fatty acids                                                                                  | 60.3<br>(50.5, 70.4)           | 72.0<br>(50.2, 92.3)         | -11.7                                               | 69.2<br>(55.3, 84.3)           | 58.4<br>(48.8, 68.7)         | 10.8                                                |
| Moderation components: Higher scores reflect lower concentrations in students' lunch intakes |                                |                              |                                                     |                                |                              |                                                     |
| Refined grains                                                                               | 91.3<br>(81.8, 100.0)          | 48.8<br>(21.6, 82.3)         | 42.5*                                               | 82.7<br>(73.5, 91.8)           | 26.9<br>(14.4, 39.7)         | 55.7*                                               |
| Sodium                                                                                       | 40.2<br>(31.3, 49.1)           | 54.5<br>(39.1, 68.7)         | -14.3                                               | 45.7<br>(36.7, 54.3)           | 27.7*<br>(16.2, 38.8)        | 17.9*                                               |
| Empty calories                                                                               | 95.7<br>(91.2, 100.0)          | 77.9<br>(66.7, 88.5)         | 17.8*                                               | 94.9<br>(89.6, 100.0)          | 79.2<br>(74.2, 84.4)         | 15.7*                                               |
| Total HEI score                                                                              | 79.8<br>(77.7, 81.7)           | 68.0<br>(60.3, 76.1)         | 11.8*                                               | 80.5<br>(77.5, 83.4)           | 62.1<br>(58.6, 65.7)         | 18.4*                                               |

Notes: Mean HEI-2010 scores are expressed as a percentage of maximum possible scores. Upper and lower limits of 95% CIs are included in parentheses below the mean HEI score. \* Within an income subgroup, the difference between NSLP participants and nonparticipants was significantly different from zero at the  $p < 0.05$  level. CI = confidence interval; HEI = Healthy Eating Index; NSLP = National School Lunch Program.

**Table 2.** Differences between NSLP participants and nonparticipants in mean HEI-2010 scores for 24 h intakes, by household income (including 95% CIs).

|                                                                                    | Lower-Income Students          |                              |                                                     | Higher-Income Students         |                              |                                                     |
|------------------------------------------------------------------------------------|--------------------------------|------------------------------|-----------------------------------------------------|--------------------------------|------------------------------|-----------------------------------------------------|
|                                                                                    | NSLP Participants<br>(n = 757) | Nonparticipants<br>(n = 210) | Difference<br>(NSLP Participants – Nonparticipants) | NSLP Participants<br>(n = 475) | Nonparticipants<br>(n = 614) | Difference<br>(NSLP Participants – Nonparticipants) |
| Adequacy components: Higher scores reflect higher concentrations in students' 24 h |                                |                              |                                                     |                                |                              |                                                     |
| Total fruit                                                                        | 95.9<br>(86.9, 100.0)          | 77.2<br>(58.8, 97.7)         | 18.7                                                | 80.4<br>(71.0, 90.2)           | 93.8<br>(83.4, 100.0)        | -13.4                                               |
| Whole fruit                                                                        | 100.0<br>(100.0, 100.0)        | 93.7<br>(69.3, 100.0)        | 6.3                                                 | 99.5<br>(93.7, 100.0)          | 100.0<br>(100.0, 100.0)      | -0.5                                                |
| Total vegetables                                                                   | 46.2<br>(41.8, 50.6)           | 46.2<br>(37.6, 55.4)         | 0.0                                                 | 42.2<br>(36.0, 48.4)           | 41.4<br>(36.5, 46.7)         | 0.8                                                 |
| Greens and beans                                                                   | 17.1<br>(11.5, 29.6)           | 30.7<br>(10.8, 52.5)         | -13.6                                               | 13.1<br>(6.5, 26.4)            | 33.1*<br>(20.1, 49.1)        | -20.0                                               |
| Whole grains                                                                       | 57.4 (51.5, 63.5)              | 41.4<br>(31.0, 52.8)         | 16.0*                                               | 58.0<br>(51.3, 64.5)           | 43.4<br>(38.3, 48.5)         | 14.5*                                               |
| Dairy                                                                              | 98.5<br>(94.1, 100.0)          | 79.6<br>(69.5, 90.4)         | 18.9*                                               | 97.7<br>(91.8, 100.0)          | 82.0<br>(76.0, 87.9)         | 15.7*                                               |
| Total protein foods                                                                | 96.1                           | 99.1                         | -3.0                                                | 97.7                           | 98.7                         | -1.1                                                |

|                                                                                             |                      |                       |       |                      |                       |       |
|---------------------------------------------------------------------------------------------|----------------------|-----------------------|-------|----------------------|-----------------------|-------|
|                                                                                             | (88.5, 100.0)        | (92.2, 100.0)         |       | (90.3, 100.0)        | (93.3, 100.0)         |       |
| Seafood and plant proteins                                                                  | 59.6<br>(47.2, 70.2) | 81.5<br>(46.6, 100.0) | -21.9 | 71.0<br>(55.7, 86.1) | 73.1<br>(59.5, 86.6)  | -2.1  |
| Fatty acids                                                                                 | 41.2<br>(37.0, 45.6) | 43.3<br>(31.4, 55.4)  | -2.0  | 37.3<br>(30.7, 44.4) | 38.6<br>(33.2, 44.2)  | -1.2  |
| Moderation components: Higher scores reflect lower concentrations in students' 24 h intakes |                      |                       |       |                      |                       |       |
| Refined grains                                                                              | 57.9<br>(54.3, 61.5) | 53.1<br>(41.5, 65.2)  | 4.7   | 62.1<br>(54.7, 69.5) | 41.9<br>(35.1, 48.7)  | 20.2* |
| Sodium                                                                                      | 45.4<br>(41.4, 49.4) | 50.7<br>(44.3, 56.9)  | -5.3  | 48.8<br>(43.8, 53.7) | 38.8*<br>(31.8, 45.8) | 10.0* |
| Empty calories                                                                              | 72.5<br>(68.8, 76.4) | 65.9<br>(60.5, 71.6)  | 6.6   | 72.0<br>(67.0, 76.8) | 72.3<br>(68.0, 76.6)  | -0.3  |
| Total HEI score                                                                             | 65.3<br>(63.4, 67.2) | 61.4<br>(56.1, 66.6)  | 3.9   | 65.0<br>(62.3, 67.5) | 60.9<br>(58.9, 63.0)  | 4.0*  |

Notes: Mean HEI-2010 scores are expressed as a percentage of maximum possible scores. Upper and lower limits of 95% CIs are included in parentheses below the mean HEI score. \* Within an income subgroup, the difference between NSLP participants and nonparticipants was significantly different from zero at the  $p < 0.05$  level.

CI = confidence interval; HEI = Healthy Eating Index; NSLP = National School Lunch Program.

**Table 3.** Differences between NSLP participants and nonparticipants in mean HEI-2010 scores for lunch intakes, by race/ethnicity (including 95% CIs).

|                                                                                              | Non-Hispanic White Students    |                              |                                                  | Non-Hispanic Black Students    |                             |                                                  | Hispanic Students              |                              |                                                  |
|----------------------------------------------------------------------------------------------|--------------------------------|------------------------------|--------------------------------------------------|--------------------------------|-----------------------------|--------------------------------------------------|--------------------------------|------------------------------|--------------------------------------------------|
|                                                                                              | NSLP Participants<br>(n = 485) | Nonparticipants<br>(n = 442) | Difference (NSLP Participants – Nonparticipants) | NSLP Participants<br>(n = 183) | Nonparticipants<br>(n = 74) | Difference (NSLP Participants – Nonparticipants) | NSLP Participants<br>(n = 376) | Nonparticipants<br>(n = 161) | Difference (NSLP Participants – Nonparticipants) |
| Adequacy components: Higher scores reflect higher concentrations in students' lunch intakes  |                                |                              |                                                  |                                |                             |                                                  |                                |                              |                                                  |
| Total fruit                                                                                  | 99.5<br>(93.9, 100.0)          | 92.2<br>(75.2, 100.0)        | 7.4                                              | 99.7<br>(96.9, 100.0)          | 92.6<br>(66.4, 100.0)       | 7.1                                              | 100.0<br>(100.0, 100.0)        | 96.3<br>(70.7, 100.0)        | 3.7                                              |
| Whole fruit                                                                                  | 100.0<br>(100.0, 100.0)        | 100.0<br>(100.0, 100.0)      | 0.0                                              | 100.0<br>(100.0, 100.0)        | 99.9<br>(100.0, 100.0)      | 0.1                                              | 100.0<br>(100.0, 100.0)        | 99.9<br>(100.0, 100.0)       | 0.1                                              |
| Total vegetables                                                                             | 56.3<br>(47.4, 65.7)           | 30.1<br>(23.5, 37.0)         | 26.3*                                            | 34.9<br>(24.8, 44.7)           | 27.2<br>(13.6, 41.4)        | 7.7                                              | 51.4<br>(39.5, 63.2)           | 50.8<br>(33.8, 67.3)         | 0.6                                              |
| Greens and beans                                                                             | 29.0<br>(13.1, 44.0)           | 16.3<br>(2.1, 33.8)          | 12.7                                             | 19.1<br>(1.3, 38.7)            | 19.5<br>(-0.4, 39.2)        | -0.4                                             | 12.9<br>(6.4, 20.7)            | 37.3<br>(11.3, 65.3)         | -24.4                                            |
| Whole grains                                                                                 | 99.9<br>(100.0, 100.0)         | 53.5<br>(39.4, 68.6)         | 46.4*                                            | 99.2<br>(89.4, 100.0)          | 68.2<br>(42.5, 89.5)        | 31.0*                                            | 100.0<br>(100.0, 100.0)        | 74.4<br>(43.4, 100.0)        | 25.6                                             |
| Dairy                                                                                        | 100.0<br>(100.0, 100.0)        | 65.0<br>(53.9, 76.9)         | 35.0*                                            | 99.9<br>(98.5, 100.0)          | 60.6<br>(46.8, 75.4)        | 39.2*                                            | 100.0<br>(100.0, 100.0)        | 75.1<br>(56.6, 94.8)         | 24.9*                                            |
| Total protein foods                                                                          | 97.2<br>(86.4, 100.0)          | 99.3<br>(92.3, 100.0)        | -2.1                                             | 99.2<br>(87.5, 100.0)          | 99.7<br>(95.0, 100.0)       | -0.4                                             | 91.2<br>(79.9, 100.0)          | 96.9<br>(81.8, 100.0)        | -5.7                                             |
| Seafood and plant proteins                                                                   | 67.3<br>(46.2, 88.1)           | 99.6<br>(93.8, 100.0)        | -32.3*                                           | 50.6<br>(27.1, 73.6)           | 34.7<br>(12.0, 60.1)        | 15.8                                             | 52.2<br>(34.2, 69.8)           | 63.7<br>(6.3, 100.0)         | -11.4                                            |
| Fatty acids                                                                                  | 62.1<br>(50.1, 75.2)           | 67.1<br>(53.2, 82.6)         | -5.0                                             | 68.2<br>(49.1, 87.7)           | 46.6<br>(29.8, 65.4)        | 21.6                                             | 67.7<br>(53.2, 82.7)           | 55.0<br>(26.0, 94.3)         | 12.7                                             |
| Moderation components: Higher scores reflect lower concentrations in students' lunch intakes |                                |                              |                                                  |                                |                             |                                                  |                                |                              |                                                  |
| Refined grains                                                                               | 86.8<br>(75.0, 98.7)           | 22.1<br>(3.7, 41.6)          | 64.7*                                            | 94.8<br>(80.4, 100.0)          | 37.8<br>(10.7, 68.0)        | 57.0*                                            | 88.0<br>(75.7, 100.0)          | 60.4<br>(38.6, 80.7)         | 27.5*                                            |
| Sodium                                                                                       | 45.4<br>(35.6, 54.8)           | 38.2<br>(21.5, 54.1)         | 7.1                                              | 35.3<br>(13.2, 55.0)           | 14.5<br>(0.0, 37.5)         | 20.8                                             | 42.7<br>(36.0, 49.8)           | 43.5<br>(30.0, 57.6)         | -0.8                                             |
| Empty calories                                                                               | 93.2<br>(87.9, 98.8)           | 76.5<br>(68.1, 85.2)         | 16.7*                                            | 95.0<br>(87.2, 100.0)          | 72.1<br>(59.4, 86.7)        | 22.8*                                            | 98.5<br>(93.8, 100.0)          | 76.5<br>(62.0, 93.8)         | 22.0*                                            |
| Total HEI score                                                                              | 80.5<br>(77.4, 83.5)           | 61.8<br>(56.3, 67.3)         | 18.8*                                            | 78.9<br>(75.4, 82.4)           | 55.9<br>(50.2, 61.3)        | 23.0*                                            | 79.9<br>(77.0, 82.7)           | 68.4<br>(57.5, 79.5)         | 11.5                                             |

Notes: Mean HEI-2010 scores are expressed as a percentage of maximum possible scores. Upper and lower limits of 95% CIs are included in parentheses below the mean HEI score. \* Within a race/ethnicity subgroup, the difference between NSLP participants and nonparticipants was significantly different from zero at the  $p < 0.05$  level. CI = confidence interval; HEI = Healthy Eating Index; NSLP = National School Lunch Program. .

**Table 4.** Differences between NSLP participants and nonparticipants in mean HEI-2010 scores for 24 h intakes, by race/ethnicity (including 95% CIs).

|                                                                                             | Non-Hispanic White Students    |                              |                                                  | Non-Hispanic Black Students    |                             |                                                  | Hispanic Students              |                              |                                                  |
|---------------------------------------------------------------------------------------------|--------------------------------|------------------------------|--------------------------------------------------|--------------------------------|-----------------------------|--------------------------------------------------|--------------------------------|------------------------------|--------------------------------------------------|
|                                                                                             | NSLP Participants<br>(n = 485) | Nonparticipants<br>(n = 442) | Difference (NSLP Participants – Nonparticipants) | NSLP Participants<br>(n = 183) | Nonparticipants<br>(n = 74) | Difference (NSLP Participants – Nonparticipants) | NSLP Participants<br>(n = 376) | Nonparticipants<br>(n = 161) | Difference (NSLP Participants – Nonparticipants) |
| Adequacy components: Higher scores reflect higher concentrations in students' 24 h intakes  |                                |                              |                                                  |                                |                             |                                                  |                                |                              |                                                  |
| Total fruit                                                                                 | 78.9<br>(68.7, 89.6)           | 76.8<br>(63.7, 90.6)         | 2.1                                              | 97.1<br>(84.2, 100.0)          | 81.0<br>(61.7, 100.0)       | 16.1                                             | 98.7<br>(91.5, 100.0)          | 92.3<br>(69.9, 100.0)        | 6.4                                              |
| Whole fruit                                                                                 | 99.3<br>(91.6, 100.0)          | 99.2<br>(90.0, 100.0)        | 0.1                                              | 95.5<br>(76.8, 100.0)          | 86.6<br>(51.6, 100.0)       | 8.9                                              | 100.0<br>(100.0, 100.0)        | 99.7<br>(95.9, 100.0)        | 0.3                                              |
| Total vegetables                                                                            | 45.9<br>(39.2, 52.5)           | 36.1<br>(31.2, 41.3)         | 9.7*                                             | 40.7<br>(34.6, 46.4)           | 47.7<br>(38.0, 57.3)        | -7.0                                             | 44.9<br>(38.6, 51.3)           | 55.7<br>(46.9, 64.7)         | -10.8                                            |
| Greens and beans                                                                            | 13.9<br>(8.1, 24.8)            | 22.8<br>(11.5, 36.3)         | -8.9                                             | 18.3<br>(10.7, 26.0)           | 73.6*<br>(26.0, 100.0)      | -55.2                                            | 11.5<br>(6.9, 17.4)            | 23.2<br>(10.8, 42.1)         | -11.7                                            |
| Whole grains                                                                                | 54.7<br>(48.6, 60.4)           | 38.5<br>(32.1, 45.2)         | 16.2*                                            | 49.1<br>(39.3, 59.1)           | 51.6<br>(22.2, 83.1)        | -2.5                                             | 68.5<br>(61.3, 75.7)           | 39.1<br>(28.2, 49.8)         | 29.4                                             |
| Dairy                                                                                       | 99.3<br>(94.8, 100.0)          | 84.7<br>(77.1, 92.7)         | 14.5*                                            | 79.5<br>(72.8, 86.3)           | 58.0<br>(47.6, 67.7)        | 21.6*                                            | 100.0<br>(99.9, 100.0)         | 84.2<br>(72.6, 96.1)         | 15.7*                                            |
| Total protein foods                                                                         | 94.7<br>(85.3, 100.0)          | 97.9<br>(89.7, 100.0)        | -3.2                                             | 99.8<br>(96.7, 100.0)          | 93.5<br>(78.2, 100.0)       | 6.2                                              | 93.3<br>(84.9, 100.0)          | 94.5<br>(82.7, 100.0)        | -1.3                                             |
| Seafood and plant proteins                                                                  | 67.2<br>(51.8, 81.5)           | 82.8<br>(64.9, 100.0)        | -15.6                                            | 49.5<br>(32.3, 69.2)           | 27.6<br>(14.1, 39.8)        | 21.9                                             | 69.3<br>(54.1, 84.1)           | 84.9<br>(40.2, 100.0)        | -15.6                                            |
| Fatty acids                                                                                 | 35.9<br>(29.7, 42.2)           | 40.6<br>(34.4, 47.1)         | -4.7                                             | 51.6<br>(43.9, 60.3)           | 44.8<br>(34.7, 55.7)        | 6.8                                              | 40.3<br>(35.0, 45.7)           | 35.4<br>(19.8, 53.7)         | 4.9                                              |
| Moderation components: Higher scores reflect lower concentrations in students' 24 h intakes |                                |                              |                                                  |                                |                             |                                                  |                                |                              |                                                  |
| Refined grains                                                                              | 63.0<br>(56.0, 69.9)           | 42.4<br>(33.4, 51.1)         | 20.6*                                            | 65.9<br>(59.9, 72.0)           | 47.3<br>(24.7, 71.2)        | 18.7                                             | 53.7<br>(45.8, 61.6)           | 46.9<br>(35.5, 57.8)         | 6.9                                              |
| Sodium                                                                                      | 50.8<br>(46.2, 55.2)           | 48.0<br>(40.3, 55.5)         | 2.8                                              | 46.0<br>(38.9, 53.1)           | 38.7<br>(27.6, 50.2)        | 7.3                                              | 42.7<br>(37.6, 47.8)           | 44.9<br>(35.0, 54.8)         | -2.2                                             |
| Empty calories                                                                              | 68.2<br>(62.9, 73.4)           | 66.8<br>(62.7, 71.2)         | 1.3                                              | 70.4<br>(62.8, 78.5)           | 62.8<br>(52.0, 73.2)        | 7.6                                              | 79.9<br>(76.0, 83.6)           | 72.9<br>(64.3, 82.6)         | 7.0                                              |
| Total HEI score                                                                             | 64.0<br>(61.0, 66.8)           | 59.6<br>(56.2, 62.8)         | 4.4*                                             | 63.3<br>(60.6, 65.7)           | 57.1<br>(50.4, 63.7)        | 6.3                                              | 67.4<br>(64.7, 69.9)           | 62.1<br>(57.2, 67.3)         | 5.2                                              |

Notes: Mean HEI-2010 scores are expressed as a percentage of maximum possible scores. Upper and lower limits of 95% CIs are included in parentheses below the mean HEI score. \* Within a race/ethnicity subgroup, the difference between NSLP participants and nonparticipants was significantly different from zero at the  $p < 0.05$  level. CI = confidence interval; HEI = Healthy Eating Index; NSLP = National School Lunch Program. .
